# Supplementary material
Source: Research Square preprint supplement (doi:10.21203/rs.3.rs-9373708/v1)
Supplement: Supplementary file 1 [file fad9d5f01cf708fdd9e510d6.docx]

Supple Table 1. Summary of clinical signs and observation in mice treated with ASC-Exosome.

| Time point | Administration period (Day 29) | | | | | | | Recovery period (Day 43) | | | |
| --- | --- | --- | --- | --- | --- | --- | --- | --- | --- | --- | --- |
| Group | G1  (Control) | G2  (2.0 × 109 particles) | | | G3  (2.0 × 109 particles) | | G4  (2.0 × 1010 particles) | G1  (Control) | | G4  (2.0 × 1010 particles) | |
| Number of animals | 15 | 10 | | | 10 | | 15 | 5 | | 5 | |
| **Clinical signs of Males** | | | | | | | | | | | |
| Normal | 15 / 15 | | 10 / 10 | 10 / 10 | | 15 / 15 | | | 5 / 5 | | 5 / 5 |
| Tail, Bent | 0 / 15 | | 0 / 10 | 0 / 10 | | 1 / 15 | | | 0 / 5 | | 0 / 5 |
| Fur, Staining, Dorsal Aspect Generalized, Blue | 2 / 15 | | 0 / 10 | 0 / 10 | | 0 / 15 | | | 0 / 5 | | 0 / 5 |
| Fur, Thin Cover, Muzzle | 1 / 15 | | 0 / 10 | 0 / 10 | | 0 / 15 | | | 0 / 5 | | 0 / 5 |
| Skin, Scab, Lumber | 0 / 15 | | 0 / 10 | 0 / 10 | | 1 / 15 | | | 0 / 5 | | 0 / 5 |
| Skin, Scab, Pinna | 0 / 15 | | 0 / 10 | 0 / 10 | | 0 / 15 | | | 0 / 5 | | 1 / 5 |
| Caught in Cage, Tail | 0 / 15 | | 0 / 10 | 0 / 10 | | 0 / 15 | | | 0 / 5 | | 0 / 5 |
| Skin, Scab, Tail | 0 / 15 | | 0 / 10 | 0 / 10 | | 0 / 15 | | | 0 / 5 | | 0 / 5 |
| Skin, Abrasion, Tail, Moderate | 0 / 15 | | 0 / 10 | 0 / 10 | | 0 / 15 | | | 0 / 5 | | 0 / 5 |
| **Clinical signs of Females** | | | | | | | | | | | |
| Normal | 15 / 15 | | 10 / 10 | 10 / 10 | | 15 / 15 | | | 5 / 5 | | 5 / 5 |
| Tail, Bent | 0 / 15 | | 0 / 10 | 0 / 10 | | 0 / 15 | | | 0 / 5 | | 0 / 5 |
| Fur, Staining, Dorsal Aspect Generalized, Blue | 0 / 15 | | 0 / 10 | 0 / 10 | | 0 / 15 | | | 0 / 5 | | 0 / 5 |
| Fur, Thin Cover, Muzzle | 0 / 15 | | 0 / 10 | 0 / 10 | | 0 / 15 | | | 0 / 5 | | 0 / 5 |
| Skin, Scab, Lumber | 0 / 15 | | 0 / 10 | 0 / 10 | | 0 / 15 | | | 0 / 5 | | 0 / 5 |
| Skin, Scab, Pinna | 0 / 15 | | 1 / 10 | 0 / 10 | | 0 / 15 | | | 0 / 5 | | 0 / 5 |
| Caught in Cage, Tail | 0 / 15 | | 0 / 10 | 0 / 10 | | 1 / 15 | | | 0 / 5 | | 0 / 5 |
| Skin, Scab, Tail | 0 / 15 | | 0 / 10 | 0 / 10 | | 1 / 15 | | | 0 / 5 | | 1 / 5 |
| Skin, Abrasion, Tail, Moderate | 0 / 15 | | 0 / 10 | 0 / 10 | | 1 / 15 | | | 0 / 5 | | 0 / 5 |

Supple Table 2. Bacterial reverse mutation assay (Ames test) for the genotoxicity evaluation of ASC-Exosome

| ASC-Exosome | | | | | | | | | | | | | | | | | | | | | | | | | | | | | | | | | | | | | | | |
| --- | --- | --- | --- | --- | --- | --- | --- | --- | --- | --- | --- | --- | --- | --- | --- | --- | --- | --- | --- | --- | --- | --- | --- | --- | --- | --- | --- | --- | --- | --- | --- | --- | --- | --- | --- | --- | --- | --- | --- |
| Dose  (µg/plate) | | | **Colonies/plate [factor] (With S9 mix) *** | | | | | | | | | | | | | | | | | | | | | | | | | | | | | | | | | | | | |
| *S. typhimurium*  TA 100 | | | | | | | | *S. typhimurium*  TA1535 | | | | | | | | *S. typhimurium*  TA98 | | | | | | | *S. typhimurium*  TA1537 | | | | | | *E. coli*  WP2 *uvr*A | | | | | | | |
| 0 |  |  | | 92.3 | ± | 37.2 | |  |  |  | 5.3 | | | ± | 1.5 |  |  |  | 20.0 | | ± | 1.0 |  |  |  | 4.3 | ± | 2.3 |  |  |  | 42.7 | | ± | 5.5 |  |  |  |
| 0.316 |  |  | | 92.7 | ± | 18.6 | | [ | 1.0 | ] | 7.3 | | | ± | 4.5 | [ | 1.4 | ] | 22.7 | | ± | 2.9 | [ | 1.1 | ] | 7.3 | ± | 1.5 | [ | 1.7 | ] | 52.3 | | ± | 3.5 | [ | 1.2 | ] |
| 1 |  |  | | 96.7 | ± | 9.2 | | [ | 1.0 | ] | 4.3 | | | ± | 1.2 | [ | 0.8 | ] | 18.0 | | ± | 6.2 | [ | 0.9 | ] | 10.0 | ± | 4.6 | [ | 2.3 | ] | 49.3 | | ± | 5.8 | [ | 1.2 | ] |
| 3.16 |  |  | | 97.7 | ± | 6.4 | | [ | 1.1 | ] | 8.0 | | | ± | 3.0 | [ | 1.5 | ] | 19.0 | | ± | 2.6 | [ | 1.0 | ] | 7.0 | ± | 1.7 | [ | 1.6 | ] | 45.0 | | ± | 17.1 | [ | 1.1 | ] |
| 10 |  |  | | 89.3 | ± | 16.8 | | [ | 1.0 | ] | 7.0 | | | ± | 2.6 | [ | 1.3 | ] | 17.3 | | ± | 3.2 | [ | 0.9 | ] | 6.3 | ± | 3.1 | [ | 1.5 | ] | 49.3 | | ± | 11.0 | [ | 1.2 | ] |
| 31.6 |  |  | | 100.3 | ± | 23.5 | | [ | 1.1 | ] | 5.7 | | | ± | 4.7 | [ | 1.1 | ] | 19.3 | | ± | 5.5 | [ | 1.0 | ] | 6.3 | ± | 2.5 | [ | 1.5 | ] | 54.3 | | ± | 3.8 | [ | 1.3 | ] |
| 100 |  |  | | 102.7 | ± | 18.7 | | [ | 1.1 | ] | 6.0 | | | ± | 1.0 | [ | 1.1 | ] | 23.7 | | ± | 3.5 | [ | 1.2 | ] | 7.0 | ± | 3.6 | [ | 1.6 | ] | 47.0 | | ± | 5.0 | [ | 1.1 | ] |
| 316 |  |  | | 108.3 | ± | 2.9 | | [ | 1.2 | ] | 7.0 | | | ± | 2.0 | [ | 1.3 | ] | 20.3 | | ± | 4.7 | [ | 1.0 | ] | 3.3 | ± | 0.6 | [ | 0.8 | ] | 48.3 | | ± | 8.6 | [ | 1.1 | ] |
| 1000 |  |  | | 106.3 | ± | 11.6 | | [ | 1.2 | ] | 9.3 | | | ± | 3.2 | [ | 1.8 | ] | 23.0 | | ± | 5.0 | [ | 1.2 | ] | 5.7 | ± | 1.2 | [ | 1.3 | ] | 47.3 | | ± | 4.5 | [ | 1.1 | ] |
| Positive Control | | | 2829.3 | | ± | 295.8 | | [ | 30.6 | ] | 268.0 | | | ± | 3.6 | [ | 50.3 | ] | 2345.3 | | ± | 567.5 | [ | 117.3 | ] | 201.7 | ± | 7.0 | [ | 46.5 | ] | 296.0 | | ± | 37.2 | [ | 6.9 | ] |
| Dose  (µg/plate) | | | **Colonies/plate [factor] (Without S9 mix) *** | | | | | | | | | | | | | | | | | | | | | | | | | | | | | | | | | | | | |
| 0 |  |  | | 73.7 | ± | 18.1 | |  |  |  | | 7.0 | | ± | 2.6 |  |  |  | 9.3 | | ± | 1.5 |  |  |  | 3.7 | ± | 1.2 |  |  |  | 49.7 | | ± | 3.1 |  |  |  |
| 0.316 |  |  | | 94.7 | ± | 12.5 | | [ | 1.3 | ] | | 7.3 | | ± | 3.5 | [ | 1.0 | ] | 16.0 | | ± | 1.0 | [ | 1.7 | ] | 5.3 | ± | 1.2 | [ | 1.5 | ] | 47.7 | | ± | 4.0 | [ | 1.0 | ] |
| 1 |  |  | | 87.7 | ± | 12.3 | | [ | 1.2 | ] | | 9.0 | | ± | 4.0 | [ | 1.3 | ] | 14.7 | | ± | 3.5 | [ | 1.6 | ] | 3.0 | ± | 2.0 | [ | 0.8 | ] | 54.3 | | ± | 9.1 | [ | 1.1 | ] |
| 3.16 |  |  | | 75.0 | ± | 7.0 | | [ | 1.0 | ] | | 6.3 | | ± | 3.5 | [ | 0.9 | ] | 15.3 | | ± | 4.2 | [ | 1.6 | ] | 7.0 | ± | 3.0 | [ | 1.9 | ] | 54.3 | | ± | 8.5 | [ | 1.1 | ] |
| 10 |  |  | | 84.7 | ± | 6.7 | | [ | 1.1 | ] | | 11.3 | | ± | 2.1 | [ | 1.6 | ] | 12.0 | | ± | 3.6 | [ | 1.3 | ] | 5.7 | ± | 3.5 | [ | 1.5 | ] | 47.7 | | ± | 7.8 | [ | 1.0 | ] |
| 31.6 |  |  | | 88.3 | ± | 6.5 | | [ | 1.2 | ] | | 9.3 | | ± | 2.3 | [ | 1.3 | ] | 16.7 | | ± | 2.3 | [ | 1.8 | ] | 5.3 | ± | 4.5 | [ | 1.5 | ] | 42.3 | | ± | 6.4 | [ | 0.9 | ] |
| 100 |  |  | | 76.7 | ± | 6.1 | | [ | 1.0 | ] | | 8.7 | | ± | 1.5 | [ | 1.2 | ] | 14.0 | | ± | 7.5 | [ | 1.5 | ] | 4.0 | ± | 1.7 | [ | 1.1 | ] | 44.0 | | ± | 5.2 | [ | 0.9 | ] |
| 316 |  |  | | 87.0 | ± | 7.5 | | [ | 1.2 | ] | | 8.0 | | ± | 2.6 | [ | 1.1 | ] | 18.0 | | ± | 1.7 | [ | 1.9 | ] | 3.7 | ± | 2.1 | [ | 1.0 | ] | 46.7 | | ± | 8.6 | [ | 0.9 | ] |
| 1000 |  |  | | 101.7 | ± | 17.6 | | [ | 1.4 | ] | | 10.0 | | ± | 6.2 | [ | 1.4 | ] | 15.7 | | ± | 3.1 | [ | 1.7 | ] | 4.3 | ± | 1.2 | [ | 1.2 | ] | 53.3 | | ± | 3.5 | [ | 1.1 | ] |
| Positive Control | | | 309.3 | | ± | 173.7 | | [ | 4.2 | ] | | 434.7 | | ± | 21.0 | [ | 62.1 | ] | 634.0 | | ± | 7.9 | [ | 67.9 | ] | 106.3 | ± | 18.0 | [ | 29.0 | ] | 593.0 | | ± | 62.6 | [ | 11.9 | ] |
|  | | | | | | |  | | | | | |  | | | | | | |  | | | | | | |  | | | | | |  | | | | | | |
| Strain (With S9 mix) | | | | | | | Positive control | | | | | | Dose (µg/plate) | | | | | | | Strain (Without S9 mix) | | | | | | | Positive control | | | | | | Dose (µg/plate) | | | | | | |
| TA 100 | | | | | | | 2-AA | | | | | | 2.5 | | | | | | | TA100 | | | | | | | SA | | | | | | 1 | | | | | | |
| TA1535 | | | | | | | 2-AA | | | | | | 2.5 | | | | | | | TA1535 | | | | | | | SA | | | | | | 1 | | | | | | |
| TA98 | | | | | | | 2-AA | | | | | | 1.0 | | | | | | | TA98 | | | | | | | 2NF | | | | | | 2.5 | | | | | | |
| TA1537 | | | | | | | 2-AA | | | | | | 2.5 | | | | | | | TA1537 | | | | | | | ICR | | | | | | 0.5 | | | | | | |
| WP2 *uvr*A | | | | | | | 2-AA | | | | | | 10 | | | | | | | WP2 *uvr*A | | | | | | | 4NQO | | | | | | 2 | | | | | | |

*Three plates/dose were used. No. of colonies of treated plate/No. of colonies of negative control plate
Abbreviations: 2-AA, 2-Aminoanthracene; SA, Sodium azide; 2-NF, 2-Nitrofluorene; ICR, ICR-191 Acridine; 4NQO, 4-nitroquinoline-N-oxide.

Supple Table 3. Assessment of body temperature in the central nervous system (CNS) of ASC-Exosome.

| Dose (particles/kg, ASC-Exosome) | | | |
| --- | --- | --- | --- |
| Control (0) | 2 x 109 | 6 x 109 | 2.0 x 1010 |
| 38.01 ± 0.54 °C | 37.91 ± 0.35 °C | 38.24 ± 0.40 °C | 37.91 ± 0.58 °C |

Data were expressed as Least squares Means ± Standard Error (n=8)

Supple Table 4. Assessment of whole body plethysmograph (WBP) in the respiratory system of ASC-Exosome.

| Dose (particles/kg, ASC-Exosome) | Respiratory rate (bpm) | | |
| --- | --- | --- | --- |
| 0:10~1:00 | 1:15~3:00 | 3:15~4:00 |
| Control (0) | 174.31±5.60 | 166.16±4.83 | 166.61±6.25 |
| 2 x 109 | 161.65±5.85 | 148.43±5.08 | 140.91±6.55 |
| 6 x 109 | 184.72±5.77 | 171.26±4.98 | 164.76±6.43 |
| 2.0 x 1010 | 176.77±5.62 | 167.44±4.85 | 164.41±6.26 |
|  |  |  |  |
| Dose (particles/kg, ASC-Exosome) | Tidal volume (mL) | | |
| 0:10~1:00 | 1:15~3:00 | 3:15~4:00 |
| Control (0) | 0.241±0.015 | 0.250±0.019 | 0.252±0.020 |
| 2 x 109 | 0.298±0.015 | 0.284±0.018 | 0.261±0.019 |
| 6 x 109 | 0.276±0.015 | 0.287±0.018 | 0.282±0.020 |
| 2.0 x 1010 | 0.306±0.016 | 0.312±0.020 | 0.315±0.021 |
|  |  |  |  |
| Dose (particles/kg, ASC-Exosome) | Minute volume (mL/minute) | | |
| 0:10~1:00 | 1:15~3:00 | 3:15~4:00 |
| Control (0) | 42.263±3.295 | 42.351±3.711 | 43.060±4.156 |
| 2 x 109 | 48.156±3.265 | 42.042±3.675 | 36.456±4.116 |
| 6 x 109 | 51.025±3.232 | 50.139±3.683 | 46.465±4.074 |
| 2.0 x 1010 | 54.951±3.467 | 53.428±3.912 | 52.995±4.381 |

Data were expressed as Least squares Means ± Standard Error (n=8)

Supple Table 5. Corrected QT interval (QTc) analysis in conscious Beagle dogs following ASC-Exosome administration.

| Dose (particles/kg, ASC-Exosome) | | | | |
| --- | --- | --- | --- | --- |
| Super-Interval | Control (0) | 3 × 1010 | 9 × 1010 | 1.5 × 1011 |
| > 0-6 HR | 231.6 ± 0.61 | 230.8 ± 0.61 | 232.0 ± 0.61 | 230.9 ± 0.61 |
| > 6-18 HR | 228.1 ± 0.90 | 226.9 ± 0.90 | 228.7 ± 0.90 | 226.0 ± 0.90 |
| > 18-24 HR | 230.7 ± 1.16 | 230.3 ± 1.16 | 229.3 ± 1.16 | 227.8 ± 1.16 |

Data were expressed as Least squares Means ± standard error (n=4).

Supple Table 6. RR interval analysis in conscious Beagle dogs following ASC-Exosome administration.

| Dose (particles/kg, ASC-Exosome) | | | | |
| --- | --- | --- | --- | --- |
| Super-Interval | Control (0) | 3 × 1010 | 9 × 1010 | 1.5 × 1011 |
| > 0-6 HR | 695.4 ± 15.24 | 693.0 ±15.24 | 665.3 ± 15.24 | 686.0 ± 15.24 |
| > 6-18 HR | 828.2 ± 19.65 | 828.1 ± 19.65 | 776.5 ± 19.65* | 786.9 ±19.65* |
| > 18-24 HR | 825.4 ± 10.35 | 823.0 ±10.35 | 786.8 ± 10.35* | 786.2 ± 10.35* |

Data were expressed as Least squares Means ± standard error (n=4).

* Significant difference at *P*<0.05 compared to vehicle control.

Supple Table 7. QT interval analysis in conscious radiotelemetry-implanted Beagle dogs treated with ASC-Exosome.

| Dose (particles/kg, ASC-Exosome) | | | | |
| --- | --- | --- | --- | --- |
| Super-Interval | Control (0) | 3 × 1010 | 9 × 1010 | 1.5 × 1011 |
| > 0-6 HR | 226.2 ± 1.15 | 225.1 ± 1.15 | 224.2 ± 1.15 | 224.0 ± 1.15 |
| > 6-18 HR | 232.0 ± 1.09 | 230.1 ± 1.09 | 228.8 ± 1.09 | 226.5 ± 1.09* |
| > 18-24 HR | 213.3 ± 1.69 | 232.5 ± 1.69 | 229.2 ± 1.69 | 227.5 ± 1.69 |

Data were expressed as Least squares Means ± standard error (n-4).

* Significant difference at *P*<0.05 compared to vehicle control.

Supple Table 8. Histopathological findings at the injection sites on Day 29 (administration period) for ASC-Exosome.

|  | Male | | | | Female | | | |
| --- | --- | --- | --- | --- | --- | --- | --- | --- |
| Group | G1  (Control) | G2  (2.0 × 109) | G3  (6.0 × 109) | G4  (2.0 × 1010) | G1  (Control) | G2  (2.0 × 109) | G3  (6.0 × 109) | G4  (2.0 × 1010) |
| Number of animals | 10 | 10 | 10 | 10 | 10 | 10 | 10 | 10 |
| Infiltration, Mixed Cell | 0 | 6 | 6 | 5 | 1 | 8 | 6 | 7 |
| Minimal | - | 5 | 6 | 5 | 1 | 6 | 3 | 2 |
| Mild | - | 1 | 0 | 0 | 0 | 2 | 3 | 3 |
| Moderate | - | 0 | 0 | 0 | 0 | 0 | 0 | 2 |

Supple Table 9. List of monoclonal antibodies and clones used for immunophenotypic analysis.

| Antigen | Host | Type | Company | Product name | Cat No. | Dilution Ration |
| --- | --- | --- | --- | --- | --- | --- |
| CD45 | Mouse | Moncolonal | BD Biosciences | BD Pharmingen™ APC-Cy™7 Rat Anti-Mouse CD45 | 557659 | 1:6 |
| CD3e | Mouse | Moncolonal | BD Biosciences | BD Pharmingen™ PerCP-Cy™5.5 Hamster Anti-Mouse CD3e | 551163 | 2.5:1 |
| CD | Mouse | Moncolonal | BioLegend | Brilliant Violet 711™ anti-mouse CD4 Antibody | 100447 | 1:3 |
| CD8a | Mouse | Moncolonal | BD Biosciences | BD Pharmingen™ PE-Cy™7 Rat Anti-Mouse CD8a | 552877 | 1.25:1 |
| CD19 | Mouse | Moncolonal | BioLegend | Alexa Fluor® 488 anti-mouse CD19 Antibody | 115521 | 1.25:1 |
| NK1.1 | Mouse | Moncolonal | BD Biosciences | BD Horizon™ BV650 Mouse Anti-Mouse NK-1.1 | 564143 | 1:3 |
| CD14 | Mouse | Moncolonal | BioLegend | Brilliant Violet 421™ anti-mouse CD14 Antibody | 123329 | 0.625:1 |
| CD25 | Mouse | Moncolonal | BD Biosciences | BD Pharmingen™ PE Rat Anti-Mouse CD25 | 553866 | 1:6 |
